# Supplementary material for: A graphyne-like porous carbon-rich network synthesized via alkyne metathesis
Source: Royal Society of Chemistry journal article supplement (doi:10.1039/c7nr02247f), 2017-01-01
Supplement: c7nr02247f1.pdf [file c7nr02247f1.pdf]

## Supporting Information

### Graphyne-like Porous Carbon-rich Network Synthesized via Alkyne Metathesis

Bin Wu,<sup>ab</sup> Manrong Li,<sup>b</sup> Shuning Xiao,<sup>b</sup> Yangkun Qu,<sup>b</sup> Xiaoyan Qiu,<sup>b</sup> Taifeng Liu,<sup>b</sup> Fenghui Tian,<sup>c</sup> Hexing Li<sup>\*ab</sup> and Shengxiong Xiao<sup>\*b</sup>

<sup>a</sup> School of Chemistry and Molecular Engineering, East China University of Science and Technology, Shanghai 200237, China

<sup>b</sup> The Education Ministry Key Laboratory of Resource Chemistry, International Joint Laboratory of Resource Chemistry, Shanghai Normal University, Shanghai 200234, China

<sup>c</sup> Institute of Computational Science and Engineering, Growing Base of National Key Laboratory, Qingdao University

\*E-mails: hexing-li@shnu.edu.cn; senksong@msn.com

#### Section S1. Materials and Methods

1,3,5-tribromobenzene, anhydrous zinc bromide, 1-propynyl-magnesium bromide (0.5 M, THF), Pd(PPh<sub>3</sub>)<sub>4</sub>, tris(t-butoxy)(2,2-dimethylpropylidyne)-tungsten(VI), tetrahydrofuran and toluene were purchased from J&K Scientific. Anhydrous and anaerobic solvents were obtained from a PureSolv™ MD-5 solvent system consisting of a Schlenk manifold with purification columns packed with activated alumina and supported copper catalyst. 1,3,5-tripropynylbenzene was synthesized according to the literature<sup>1</sup>.

<sup>1</sup>H NMR and <sup>13</sup>C NMR spectra were measured on a Bruker AVANCE III Fourier 400 M spectrometer. <sup>13</sup>C Solid-state NMR spectra was recorded on a VARIAN VNMRS-400WB spectrometer with a 7.5 mm T3HX probe at 100.54 MHz and a spinning rate of 9 kHz. Fourier transform infrared (FT-IR) spectra was recorded on a Nicolet Magna 550 Fourier transform infrared spectroscopy. Raman data was collected on Dilor Super LabRam II. Field-emission Scanning (FE-SEM) was performed on a HITACHI S4800 operating at an accelerating voltage ranging from 1.0 to 15 kV. The

sample was prepared by dispersing the material onto conductive adhesive tapes attached to a flat aluminum sample holder and then coated with Platinum. Transmission Electron Microscope (TEM) was measured on a FEI Tecnai G2 F20. Atomic Force Microscope (AFM) was examined on a Nanoscope IIIa Multimode through Tapping Mode in air at room temperature. Elemental analysis was conducted on a VARIO EL cube. Impedance measurement was performed on a BAS Epsilon Electrochemical Workstation. The X-ray diffraction pattern (XRD) of the material was characterized using X-ray diffraction (D/MAX-2000 with CuK $\alpha$  radiation). X-ray photoelectron spectra (XPS) was collected on Dilor Super LabRam II. Ultraviolet photoelectron spectra (UPS) was obtained on a Thermo Scientific Escalab 250Xi. UV-Vis Diffuse Reflection Spectroscopy (UV-Vis DRS) was recorded on a SHIMADZU UV-2600. Thermogravimetric analysis (TGA) from 20-800 °C was carried out on a Perkin-Elmer 7 Series in nitrogen atmosphere using a 10 °C/min ramp without equilibration delay.

Energy calculations were based on density functional theory (DFT) and were implemented in the CASTEP package<sup>2</sup>. The generalized gradient approximation (GGA) of Perdew-Burke-Ernzerhof (PBE)<sup>3</sup> for the exchange-correlation term was applied. Considering that the van der Waals interaction is significant for layered structures, the empirical correction method proposed by Grimme (DFT-D3)<sup>4, 5</sup> was used. For our computation, 3 $\times$ 3 $\times$ 3 k-points were used, and 520 eV was chosen as the cutoff energy.

The nitrogen isotherms were measured at 77 K using a Quantachrome Nova 4000e surface area size analyzer. Before measurement, the samples were degassed in vacuum at 100 °C for 12 h. N<sub>2</sub> and CO<sub>2</sub> physisorption isotherms were measured up to 1 bar at 281 K and 298 K using a Micrometrics ASAP 2020 surface area analyzer. Prior to measurements, samples were degassed for over 12 h at 100 °C.

## **Section S2 Synthesis and Methods**

**Synthesis of 1,3,5-Tripropynylbenzene**<sup>1</sup>. To a solution of anhydrous zinc bromide (676 mg, 3 mmol) in 10 mL of THF was added dropwise 1-propynylmagnesium bromide (0.5 M, THF, 6 mL) at 0 °C followed by Pd(PPh<sub>3</sub>)<sub>4</sub> (86 mg, 0.08 mmol) and 1,3,5-tribromobenzene (312 mg, 1.0 mmol). The cooling bath was removed, the

reaction mixture was heated at reflux for 8 h, and the solution was cooled to room temperature and quenched by a saturated aqueous solution of ammonium chloride. The organic layer was washed successively with water and brine and then dried over  $\text{MgSO}_4$ . After evaporation of the solvent, column chromatography (silica gel, hexane/ether 50/1) afforded the product as white solid in yield 72%.  $^1\text{H}$  NMR ( $\text{CDCl}_3$ ,  $\text{Me}_4\text{Si}$ ):  $\delta$  (ppm) 2.02 (s, 9H,  $\text{CH}_3$ ), 7.28 (s, 3H, Ar-H).  $^{13}\text{C}$  NMR ( $\text{CDCl}_3$ ,  $\text{Me}_4\text{Si}$ ):  $\delta$  (ppm) 4.31, 78.53, 86.60, 124.31, 133.51. HR-MS:  $m/z$  calcd. for  $\text{C}_{15}\text{H}_{12}$  192.0939, found 192.0941. Anal. Calcd. for  $\text{C}_{15}\text{H}_{12}$ : C 93.71; H 6.29. Found: C 93.67; H 6.39.

**Synthesis of graphyne-like porous carbon-rich network through Alkyne Metathesis**<sup>6</sup>. 1,3,5-Tripropynylbenzene (192 mg, 1.0 mmol) and tris(*t*-butoxy)(2,2-dimethylpropylidene)tungsten(VI) (23.5 mg, 0.05 mmol) were dissolved in anhydrous toluene which were obtained from a PureSolv™ MD-5 solvent system consisting of a Schlenk manifold with purification columns packed with activated alumina and supported copper catalyst (12 mL) and heated for 24 h to 90 °C under argon atmosphere without stirring. In order to form large flakes, the efficient removal of 2-butyne is necessary. The reaction mixture was then exposed to a vacuum for five times at 30 min intervals across 2.5 h period. The solvent evaporated during the vacuum exposure was compensated, and the reaction vessel was sealed. Acetone (~100 mL) was added, and the gel like network was broken into tiny pieces. The graphyne-like porous carbon-rich network was isolated as a brown powder from the solvent by filtration and was insoluble in common organic solvents.

## Section S3 Characterization of precursors and model compounds

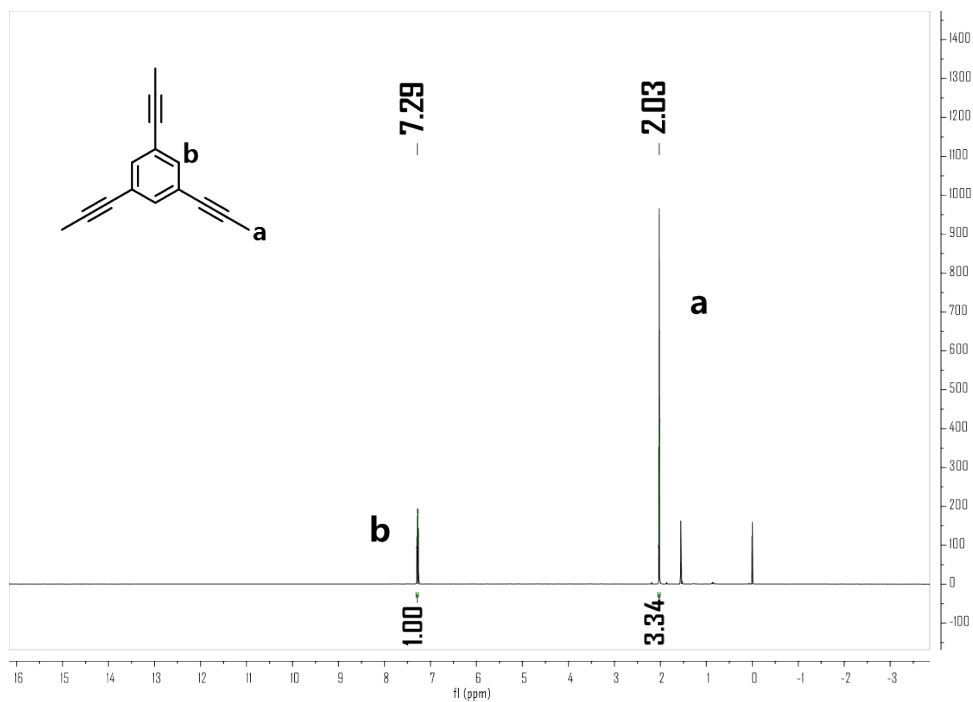

Figure S1. <sup>1</sup>H-NMR of 1,3,5-tripropynylbenzene (Chloroform-d).

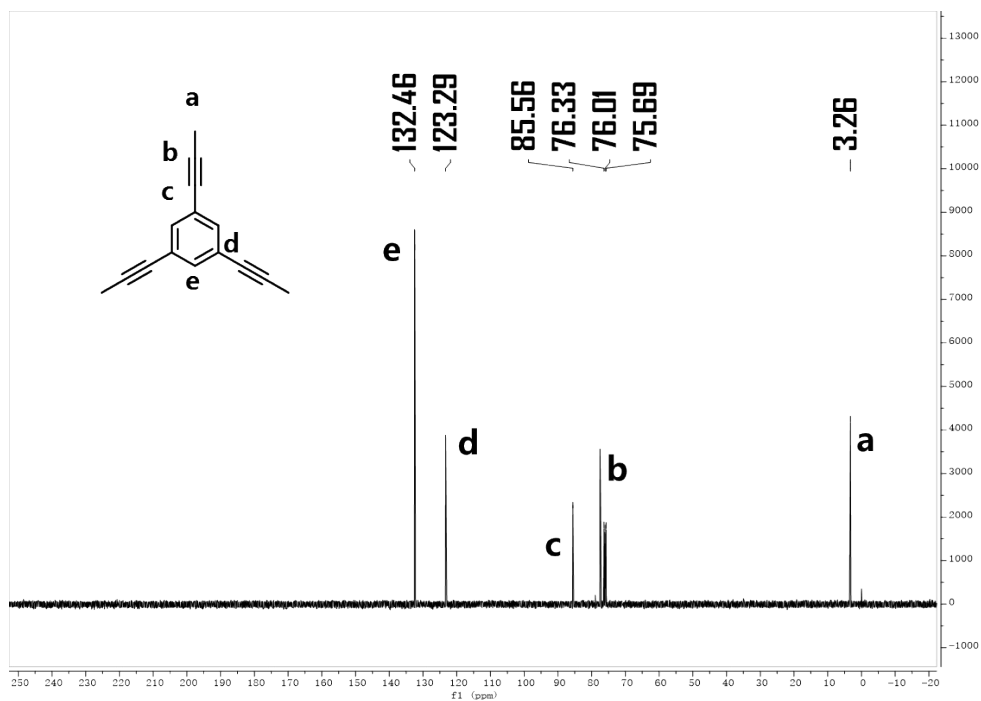

Figure S2. <sup>13</sup>C-NMR of 1,3,5-tripropynylbenzene (Chloroform-d).

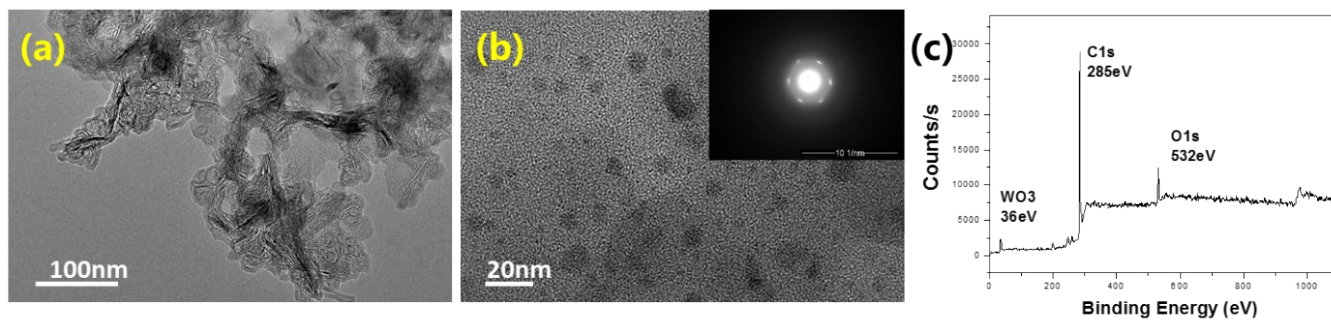

Figure S3. TEM images (a) magnification  $\times 97000$ ; (b) magnification  $\times 285000$  (inset: SAED pattern); (c) XPS spectra (survey scan) of graphyne-like porous carbon-rich network from samples prepared by reaction time of 72h).

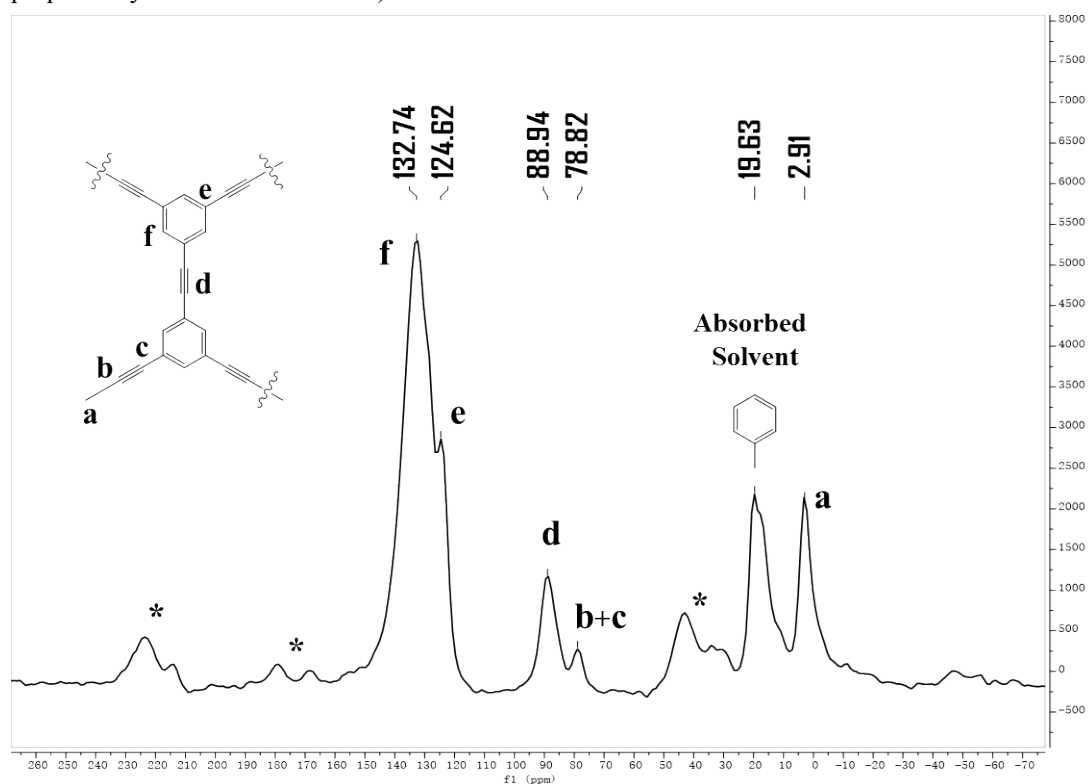

Figure S4. Solid state  $^{13}\text{C}$ -NMR of graphyne-like porous carbon-rich network (9 kHz). Asterisks denote spinning sidebands.

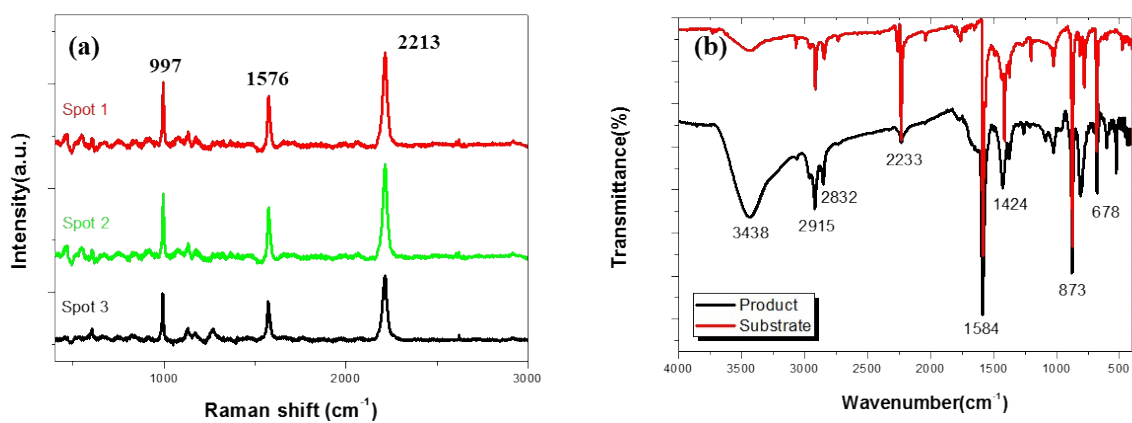

Figure S5. (a) FT-IR spectra and (b) Raman of graphyne-like porous carbon-rich network.

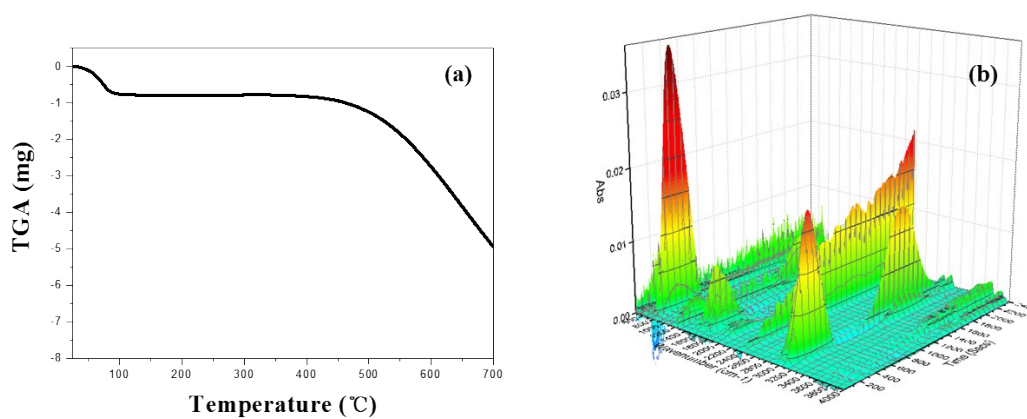

Figure S6. (a) TG and (b) TG-IR of graphyne-like porous carbon-rich network.

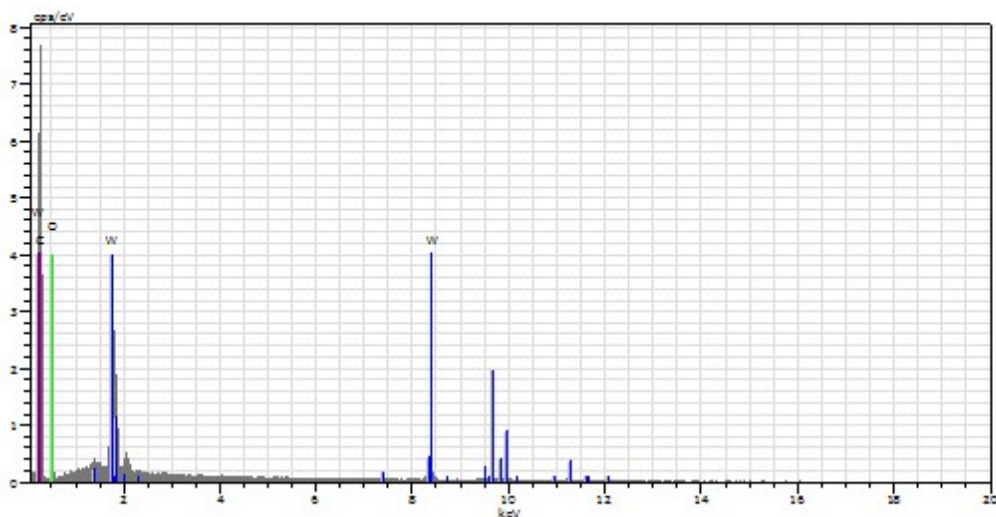

| El     | AN | Series   | unn. C norm. C Atom. C Error |        |        |        |
|--------|----|----------|------------------------------|--------|--------|--------|
|        |    |          | [wt.%]                       | [wt.%] | [at.%] | [wt.%] |
| C      | 6  | K-series | 80.36                        | 83.47  | 95.59  | 9.9    |
| O      | 8  | K-series | 3.89                         | 4.04   | 3.48   | 0.9    |
| W      | 74 | L-series | 12.02                        | 12.49  | 0.93   | 0.4    |
| Total: |    |          | 96.28                        | 100.00 | 100.00 |        |

Figure S7. EDS of graphyne-like porous carbon-rich network (detailed information).

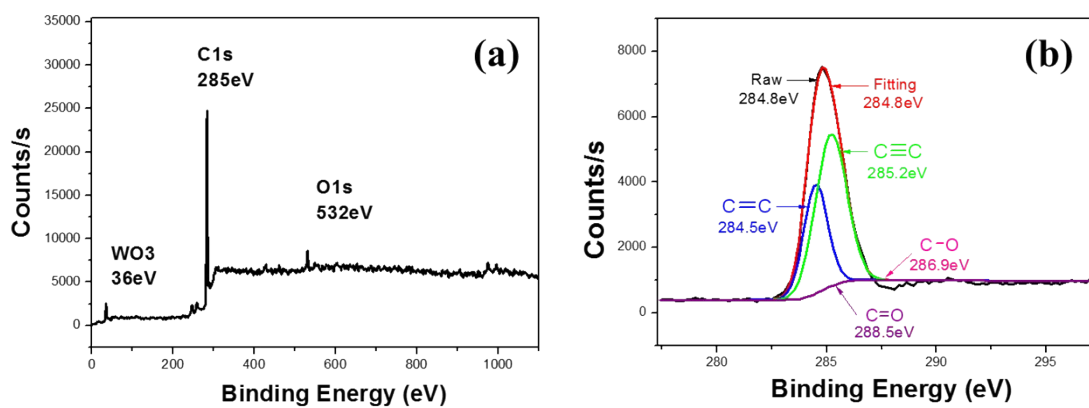

Figure S8. XPS spectra of graphyne-like porous carbon-rich network (a) survey scan (b) narrow scan for element C.

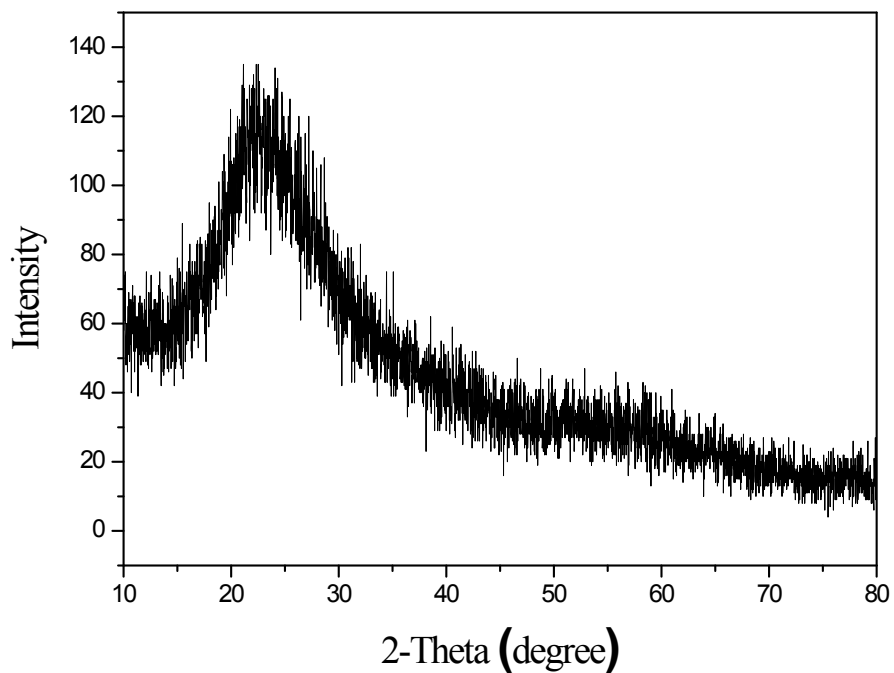

Figure S9. XRD spectra of graphyne-like porous carbon-rich network.

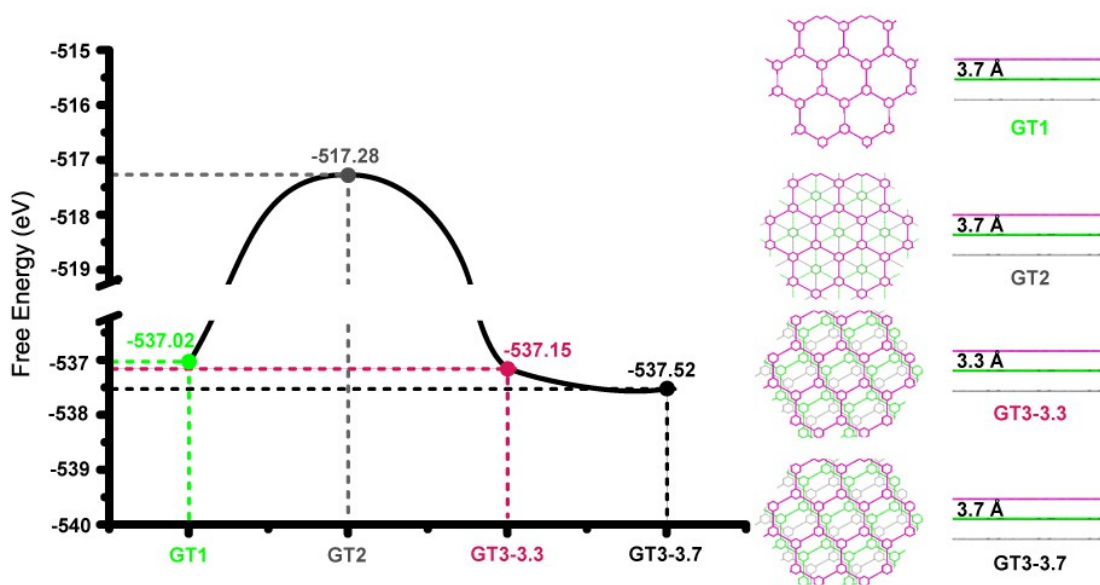

Figure S10. Energy diagram and structure representations of tilted layered structures of graphyne-like porous carbon-rich network GT1, GT2, GT3-3.3 and GT3-3.7.



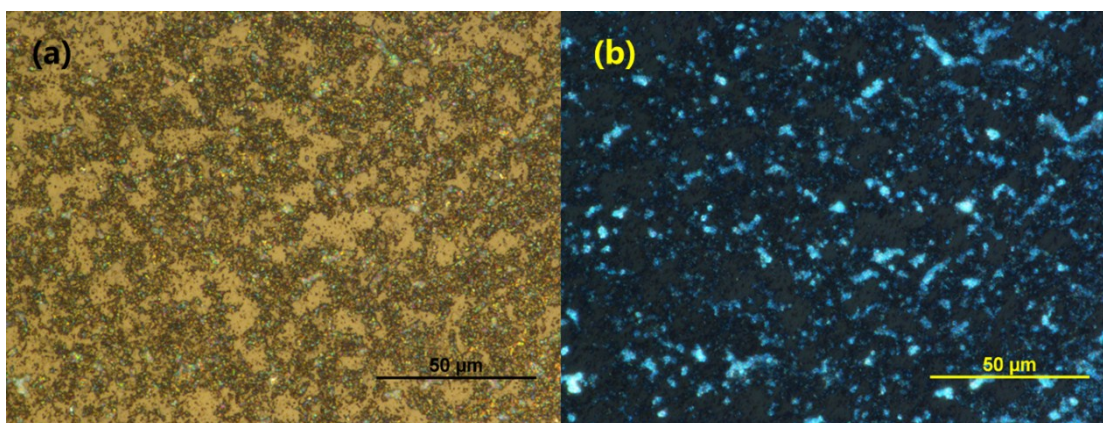

Figure S11. Polarizing Microscope images of graphyne-like porous carbon-rich network (a) bright field and (b) dark field.

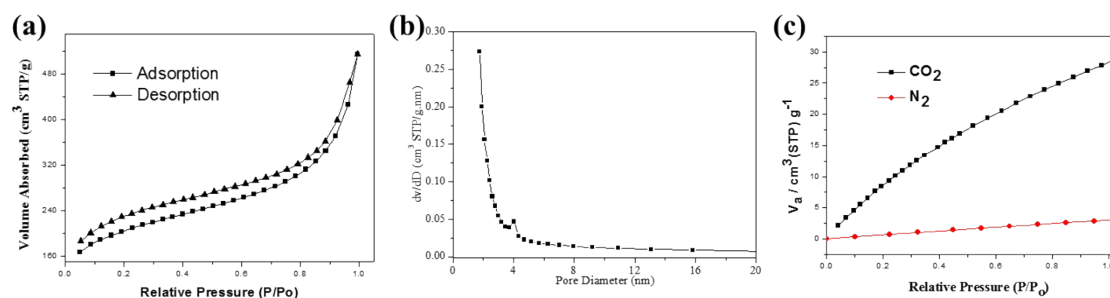

Figure S12. Gas sorption measurements for graphyne-like porous carbon-rich network. (a)  $N_2$  adsorption and desorption isotherms at 77 K; (b) Pore size distribution; (c)  $CO_2$  and  $N_2$  isotherms at 281 K.

## References:

1. J. Liu, S. Zhang, W.-X. Zhang and Z. Xi, *Organometallics*, 2008, **28**, 413-417.
2. M. D. Segall, J. D. L. Philip, M. J. Probert, C. J. Pickard, P. J. Hasnip, S. J. Clark and M. C. Payne, *Journal of Physics: Condensed Matter*, 2002, **14**, 2717.
3. J. P. Perdew, K. Burke and M. Ernzerhof, *Physical review letters*, 1996, **77**, 3865.
4. S. Grimme, J. Antony, S. Ehrlich and H. Krieg, *The Journal of chemical physics*, 2010, **132**, 154104.
5. S. Grimme, S. Ehrlich and L. Goerigk, *Journal of computational chemistry*, 2011, **32**, 1456-1465.
6. Y. Zhu, H. Yang, Y. Jin and W. Zhang, *Chemistry of Materials*, 2013, **25**, 3718-3723.
